# Supplementary material for: A Hydrogel as a Bespoke Delivery Platform for Stromal Cell-Derived Factor-1
Source: MDPI journal article supplement (doi:10.3390/gels8040224), 2022-04-06
Supplement: s1 [file s1]

## Article

# A Hydrogel as a Bespoke Delivery Platform for Stromal Cell-Derived Factor-1

Yi Wang<sup>1,2</sup>, Vanessa Penna<sup>3</sup>, Richard J. Williams<sup>4</sup>, Clare L. Parish<sup>3,†</sup> and David R. Nisbet<sup>1,5,6,7,\*</sup>

<sup>1</sup> The Graeme Clark Institute, The University of Melbourne, Melbourne, Australia; yi.wang24@unimelb.edu.au

<sup>2</sup> Department of Biomedical Engineering, Faculty of Engineering and Information Technology, The University of Melbourne, Melbourne, Australia

<sup>3</sup> The Florey Institute of Neuroscience and Mental Health, The University of Melbourne, Parkville, VIC 3052, Australia; vanessa.penna@florey.edu.au (V.P.); clare.parish@florey.edu.au (C.L.P.)

<sup>4</sup> Institute for Mental and Physical Health and Clinical Translation, School of Medicine, Deakin University, Warun Ponds, VIC 3216, Australia; richard.williams@deakin.edu.au

<sup>5</sup> Laboratory of Advanced Biomaterials, Research School of Chemistry and the John Curtin School of Medical Research, The Australian National University, Canberra 2601, Australia

<sup>6</sup> Melbourne Medical School, Faculty of Medicine, Dentistry and Health Science, The University of Melbourne, Melbourne, Australia

<sup>7</sup> Department of Biomedical Engineering, Faculty of Engineering and Information Technology, The University of Melbourne, Melbourne, Australia

\* Correspondence: david.nisbet@unimelb.edu.au

† These authors contributed equally to this work.

## Supporting information

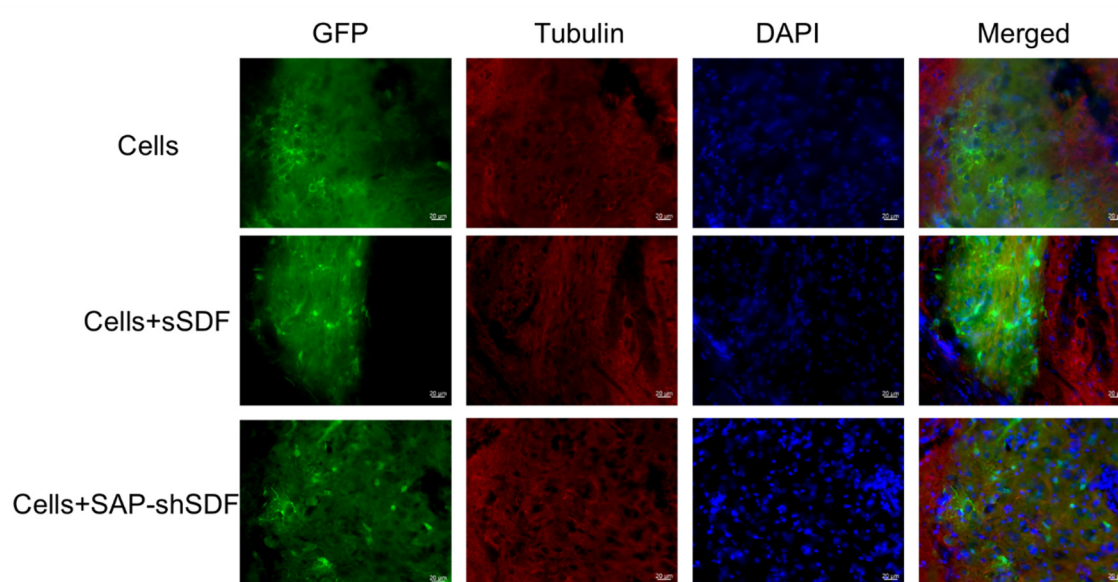

**Figure S1.** Representative photomicrographs staining with GFP+,  $\beta$ III-tubulin+, DAPI+ and merged images in Cells group, Cells + sSDF group, and Cells + SAP-shSDF group, demonstrating immature neurons in all groups.
